# Supplementary material for: Mutualistic Co-evolution of Type III Effector Genes in Sinorhizobium fredii and Bradyrhizobium japonicum
Source: PubMed Central journal article supplement (PMC3585131; doi:10.1371/journal.ppat.1003204), 2013-02-28
Supplement: ppat.1003204.s003.pdf [file ppat.1003204.s003.pdf]

**Table S1. Statistics for genome assemblies.**

| Strain*                      | Read length<br>(# channels) <sup>†</sup> | # of PE<br>reads <sup>‡</sup> | # of<br>Contigs <sup>§</sup> | Size<br>(Mb) <sup>¶</sup> | N50<br>(kb) <sup>  </sup> | Predicted<br># CDSs <sup>**</sup> |
|------------------------------|------------------------------------------|-------------------------------|------------------------------|---------------------------|---------------------------|-----------------------------------|
| <i>S. fredii</i> NGR234*     | -                                        | -                             | -                            | 6.9                       | -                         | 6322                              |
| <i>S. fredii</i> USDA207     | 32mer (2)                                | 22,136,363                    | 291                          | 6.5                       | 27.8                      | 6995                              |
| <i>S. fredii</i> USDA257     | 32mer (2)                                | 27,603,487                    | 384                          | 7.0                       | 26.7                      | 6723                              |
| <i>B. japonicum</i> USDA6    | 32mer (3)                                | 20,995,355                    | 788                          | 8.7                       | 19.6                      | 7960                              |
| <i>B. japonicum</i> USDA110* | -                                        | -                             | -                            | 9.1                       | -                         | 8317                              |
| <i>B. japonicum</i> USDA122  | 72mer (0.5)                              | 19,430,723                    | 186                          | 8.9                       | 31                        | 8107                              |
| <i>B. japonicum</i> USDA123  | 32mer (3)                                | 27,393,134                    | 815                          | 9.1                       | 21.6                      | 8361                              |
| <i>B. japonicum</i> USDA124  | 32mer (3)                                | 14,219,973                    | 1285                         | 8.9                       | 19.3                      | 7943                              |
